# Supplementary material for: CD11c+ M1-like macrophages (MΦs) but not CD206+ M2-like MΦ are involved in folliculogenesis in mice ovary
Source: PubMed Central journal article supplement (PMC5970206; doi:10.1038/s41598-018-25837-3), 2018-05-25
Supplement: 41598_2018_25837_MOESM1_ESM.pdf [file 41598_2018_25837_MOESM1_ESM.pdf]

## CD11c<sup>+</sup> M1-like macrophages (MΦs) but not CD206<sup>+</sup> M2-like MΦ are involved in folliculogenesis in mice ovary

Yosuke Ono<sup>1\*</sup>, Miwako Nagai<sup>2\*</sup>, Osamu Yoshino<sup>1</sup>, Kaori Koga<sup>2</sup>, Allah Nawaz<sup>3</sup>, Hideki Hatta<sup>4</sup>, Hirofumi Nishizono<sup>5</sup>, Gentaro Izumi<sup>2</sup>, Akitoshi Nakashima<sup>1</sup>, Johji Imura<sup>4</sup>, Kazuyuki Tobe<sup>3</sup>, Tomoyuki Fujii<sup>2</sup>, Yutaka Osuga<sup>2\*\*</sup> and Shigeru Saito<sup>1\*</sup>

### Supplemental Material

**Supplemental Figure 1.** Confirmation of depletion of CD206<sup>+</sup> cells and CD11c<sup>+</sup> cells in spleen by flow cytometry analysis.

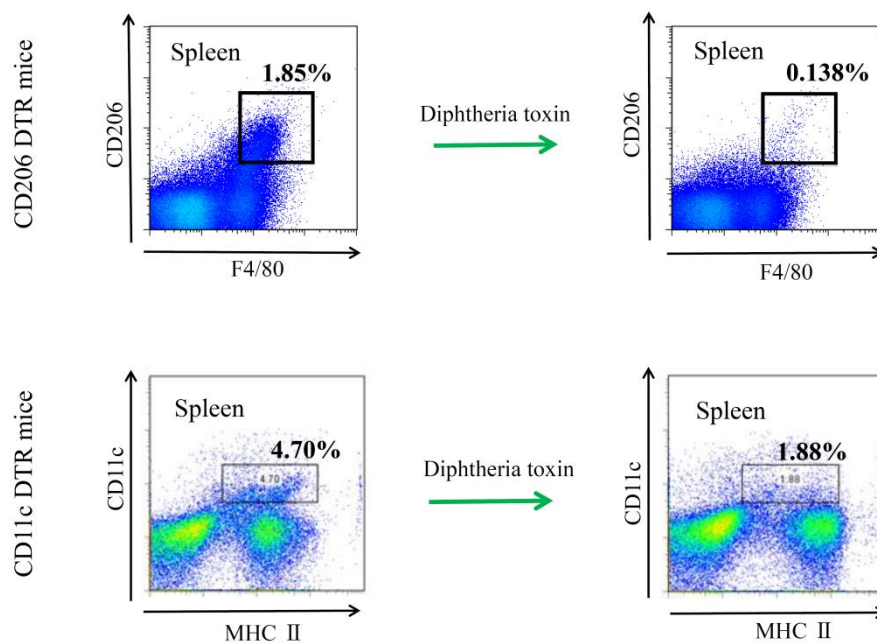

**Supplemental Figure 2.**

Follicular induction protocol in mice. Follicular growth was induced by PMSG 10 IU for 48h stimulation. Diphtheria toxin (DT) was used to deplete CD206+ and CD11c+ cells.

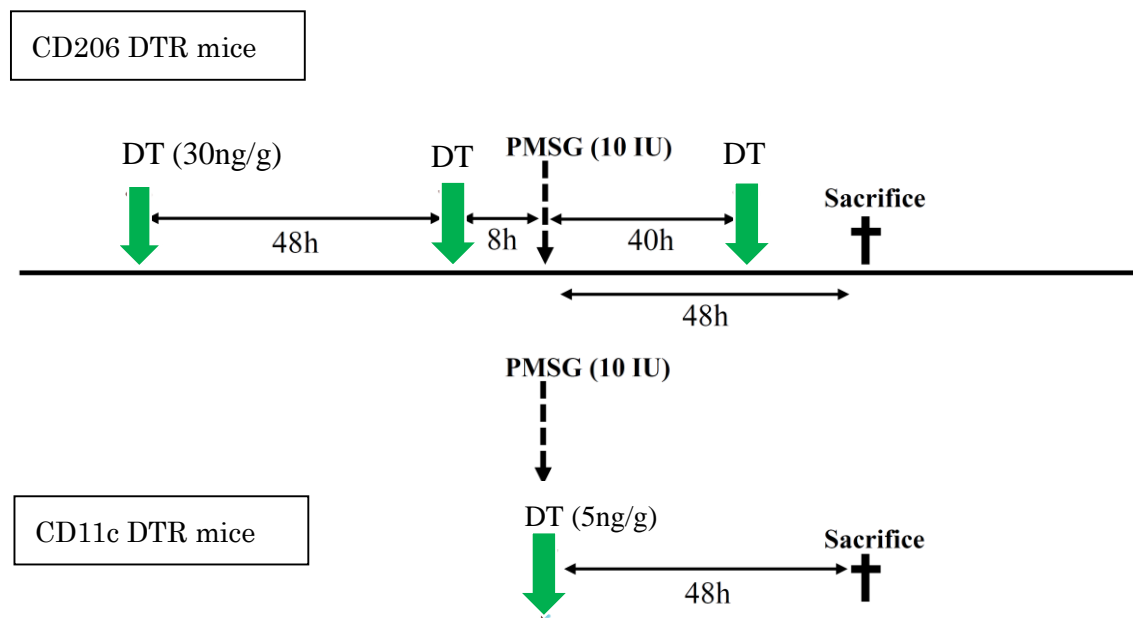

DTx : : Diphtheria toxin

**Supplemental Figure 3.** How to count the number of follicles at each stage in wild type (WT) and CD11c-diphtheria toxin receptor (DTR) mice.

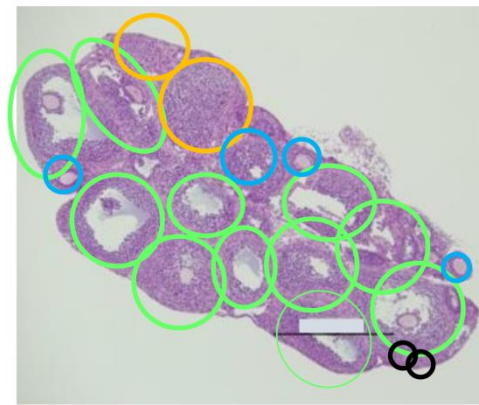

WT

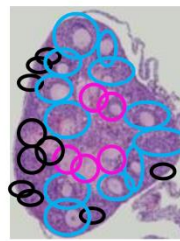

CD11c-DTR

○ :Atresia    ○ :Primordial    ○ :Primary    ○ :Secondary    ○ :Antral    ○ :Corpus Luteum

**Supplemental Figure 4.** The protocol to examine the role of M2 macrophages (MΦs) in ovulatory induction. Superovulation was induced by PMSG (10 IU) 48h followed by hCG (10IU) 15h. Diphtheria toxin (DT: 30ng/g) was used to deplete CD206+ cells.

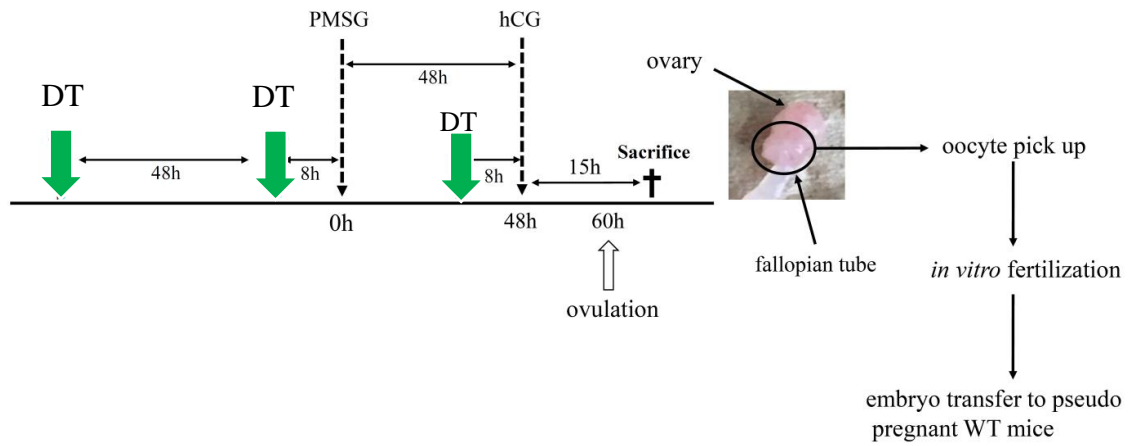

**Supplemental Figure 5.** The protocol to investigate the impact of oocytes derived from CD206 DTR mice for fertilization and implantation. WT and CD206 DTR mice derived oocytes were *in vitro* fertilized and these embryos were transferred to pseudo pregnant WT mice, respectively.

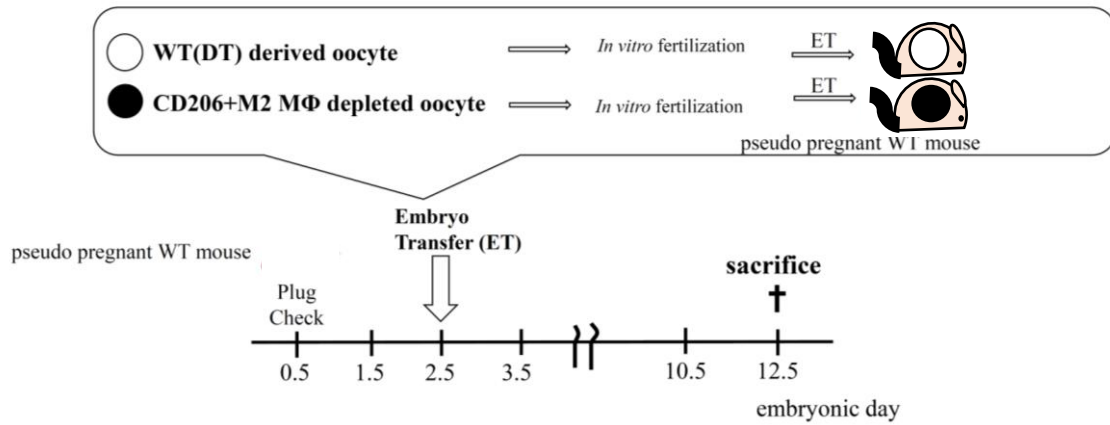

**Supplemental Figure 6.** Expressions of the mRNA of vascular endothelial growth factor (VEGF-

A) and the ratio of matrix metalloproteinase-9 (MMP-9) / tissue Inhibitor of metalloproteinase

(TIMP-1) in ovary in WT and CD11c DTR mice 48h after PMSG (10 IU) treatment by q-PCR.

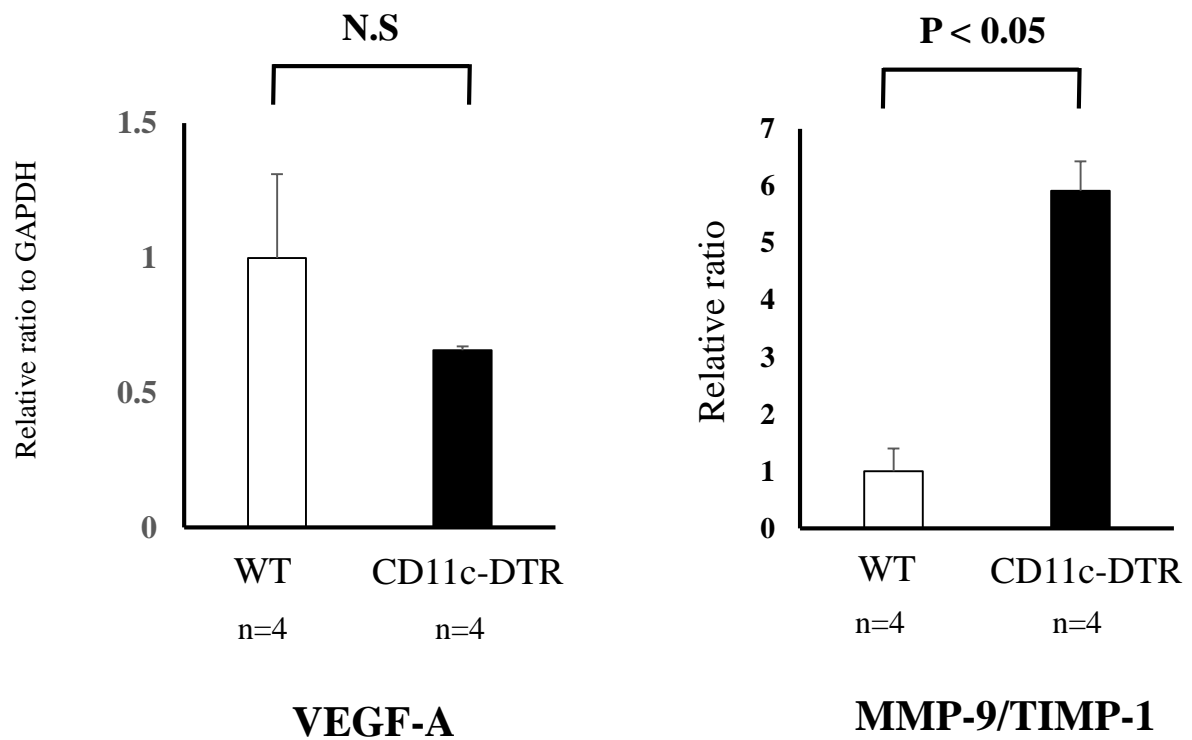

Primers sequences of MMP-9, VEGF are shown below

VEGF (forward, 5'-CCCACGACAGAAGGAGAGCAGAAGT- 3' and reverse,

CATCAGCGGCACACAGGACGG). MMP-9 (forward, 5'

CGTCATTTCGCGTGGATAAGG - 3' and reverse, TTTGGAAACTCACACGCCAG).

TIMP-1 (forward, 5'-CCCTTTGCATCTCTGGCATC-3' and reverse,

GCATTTCACAGCCTTGAA). The levels of VEGF mRNA was not changed compared to

WT and higher ratio of MMP-9 / TIMP-1 was observed.

A *P*-value of < 0.05 was considered statistically significant by *Mann-Whitney U test*.

N.S; not significant compared to WT mice. n; the number of mice.
